# Supplementary material for: Synthesis of highly dispersed boron-promoted nickel nanocatalysts and significantly enhanced catalytic performance in hydrodechlorination of chlorobenzene
Source: Royal Society of Chemistry journal article supplement (doi:10.1039/c4ta02787f), 2014-07-10
Supplement: c4ta02787f1.pdf [file c4ta02787f1.pdf]

## **Supporting Information**

### **Synthesis of highly dispersed boron-promoted nickel nanocatalysts and significantly enhanced catalytic performance in hydrodechlorination of chlorobenzene**

Meng Lan, Guoli Fan, Yihe Wang, Lan Yang, Feng Li\*

State Key Laboratory of Chemical Resource Engineering, Beijing University of Chemical  
Technology, P.O. BOX 98, Beijing, 100029, P.R. China

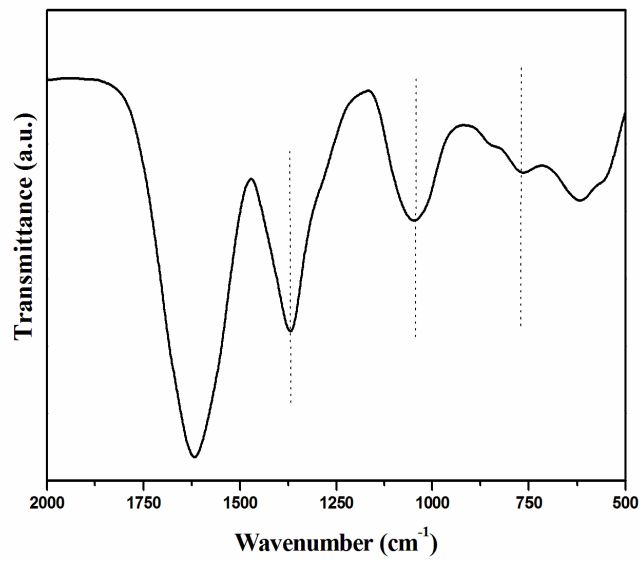

**Fig. S1.** FT-IR spectrum of B-LDH-1.5 sample.

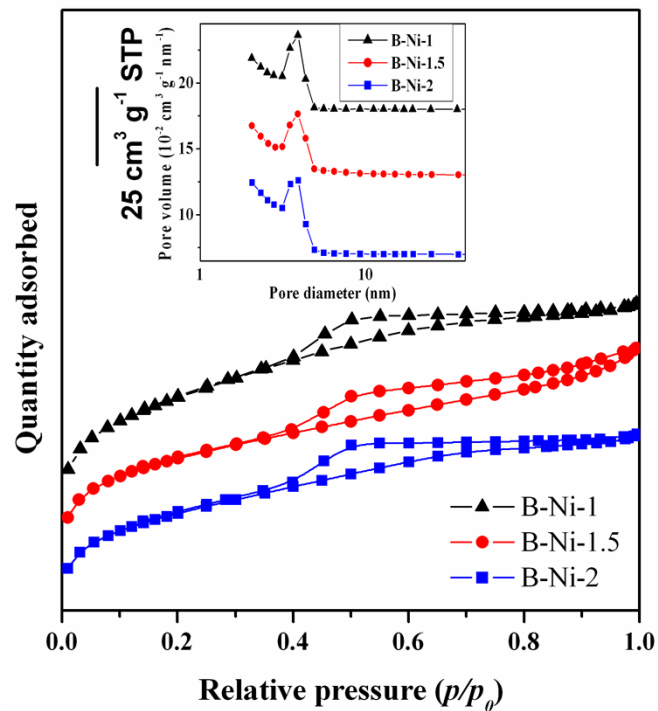

**Fig. S2.** Nitrogen adsorption–desorption isotherms of different B-Ni-x samples. Inset shows the pore size distribution curves of samples.

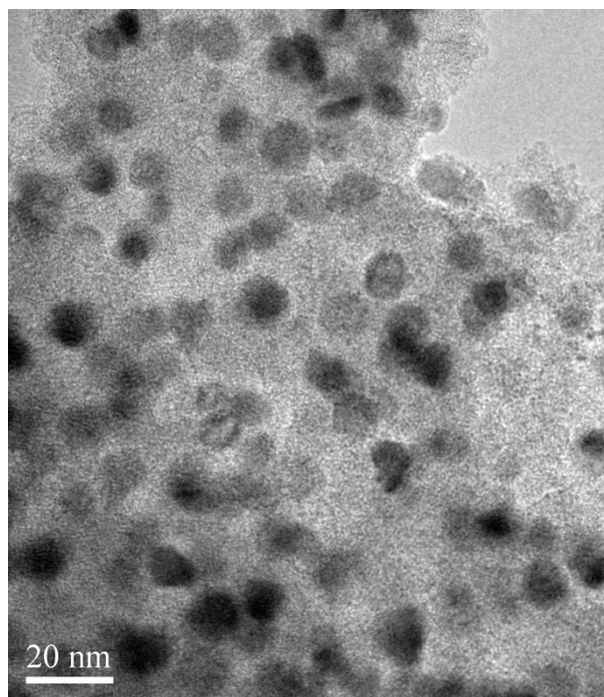

**Fig. S3.** TEM image of 1.5-B-Ni catalyst after four times recycling experiments.
